# Supplementary material for: Associations of Benzodiazepines, Z-Drugs, and Other Anxiolytics With Subsequent Dementia in Patients With Affective Disorders: A Nationwide Cohort and Nested Case-Control Study
Source: Atypon-hosted journal article supplement (doi:10.1176/appi.ajp.2019.19030315), 2020-04-07

## **Supplementary tables**

**Supplementary Table S1: Specification of codes used for definition of variables**

**Supplementary Table S2: Mortality (%) in relation to ever use of BZD, age and follow-up time**

**Supplementary Table S3: Distribution of the most frequently (2 or more percent of all prescriptions) prescribed types of antidepressants in patients with affective disorder, 1995-2016**

**Supplementary Table S4: Distribution of covariates in relation to ever use of benzodiazepines (BZD) and related drugs in patients with affective disorder, 1995-2016**

**Supplementary Table S5: The distribution of overlap in use of different drug types**

**Supplementary Table S6: Hazard and Odds Ratios and 95% Confidence Intervals (CI) for associations of Benzodiazepines and related drugs with subsequent dementia in patients with affective disorders**

**Supplementary Table S7: Hazard Ratios and 95% Confidence Intervals (CI) for associations of Benzodiazepines and related drugs with subsequent dementia in patients with affective disorders**

**Supplementary Table S8: Odds Ratios and 95% Confidence Intervals (CI) for associations of Benzodiazepines (BZD) and Z drugs with dementia diagnosed before study entry**

**Supplementary Table S9: Subdistribution Hazard Ratios and 95% Confidence Intervals (CI) for associations of Benzodiazepines and related drugs with subsequent dementia in patients with affective accounting for competing mortality**

**Supplementary Figure S1: Adjusted Hazard and Odds Ratios (95% Confidence Intervals) of the association between number of prescriptions and cumulated dose (DDD) of treatment with BZD and Z-drugs as cubic splines with 4 knots and subsequent dementia in patients with affective disorders. A value of 1 prescription/DDD was reference value.**

| <b>Supplementary Table S1: Specification of codes used for definition of variables</b> |                                                                  |                                                                      |
|----------------------------------------------------------------------------------------|------------------------------------------------------------------|----------------------------------------------------------------------|
| <b>Variable</b>                                                                        | <b>ATC code / Information, from Danish Prescription registry</b> | <b>Short/medium or long acting</b>                                   |
| <b>EXPOSURE</b>                                                                        |                                                                  |                                                                      |
| <b>Benzodiazepines</b>                                                                 |                                                                  |                                                                      |
| Alprazolam                                                                             | N05BA12                                                          | Short/medium acting                                                  |
| Bromazepam                                                                             | N05BA08                                                          | Short/medium acting                                                  |
| Brotizolam                                                                             | N05CD09                                                          | Short/medium acting                                                  |
| Chlordiazepoxid                                                                        | N05BA02                                                          | Long acting                                                          |
| Clobazam                                                                               | N05BA09                                                          | Long acting                                                          |
| Clonazepam                                                                             | N03AE01                                                          | Long acting                                                          |
| Diazepam                                                                               | N05BA01                                                          | Long acting                                                          |
| Estazolam                                                                              | N05CD04                                                          | Short/medium acting                                                  |
| Flunitrazepam                                                                          | N05CD03                                                          | Long acting                                                          |
| Lorazepam                                                                              | N05BA06                                                          | Short/medium acting                                                  |
| Lormetazepam                                                                           | N05CD06                                                          | Short/medium acting                                                  |
| Midazolam                                                                              | N05CD08                                                          | Short/medium acting                                                  |
| Nitrazepam                                                                             | N05CD02                                                          | Long acting                                                          |
| Oxazepam                                                                               | N05BA04                                                          | Short/medium acting                                                  |
| Temazepam                                                                              | N05CD07                                                          | Short/medium acting                                                  |
| Triazolam                                                                              | N05CD05                                                          | Short/medium acting                                                  |
| <b>Benzodiazepine derivates</b>                                                        |                                                                  |                                                                      |
| Zaleplon                                                                               | N05CF03                                                          | Short/medium acting                                                  |
| Zolpidem                                                                               | N05CF02                                                          | Short/medium acting                                                  |
| Zopiclone                                                                              | N05CF01                                                          | Short/medium acting                                                  |
| <b>Other anxiolytics/hypnotics</b>                                                     |                                                                  |                                                                      |
| Bupiron                                                                                | N05BE01                                                          |                                                                      |
| Hydrixizine                                                                            | N05BB01                                                          |                                                                      |
| Pregabalin                                                                             | N03AX16                                                          |                                                                      |
| <b>OUTCOME</b>                                                                         |                                                                  | <b>ICD code / Information, from Danish National Patient registry</b> |
| <b>Dementia</b>                                                                        | N06D                                                             | ICD8: 290 ICD10:F00-F03; G30                                         |
| <b>COVARIATES</b>                                                                      |                                                                  | :                                                                    |
| <b>Depression subtype</b>                                                              |                                                                  |                                                                      |
| Manic/bipolar                                                                          |                                                                  | ICD10: F30, F31                                                      |
| Single or recurrent depression, mild                                                   |                                                                  | ICD10: F320, F330                                                    |
| Single or recurrent depression, moderate                                               |                                                                  | ICD10: F321, F331                                                    |
| Single or recurrent depression, severe                                                 |                                                                  | ICD10: F322, F323, F332, F333                                        |
| Single or recurrent depression, other                                                  |                                                                  | ICD10: F328,F329,F334, F339                                          |
| Persistent or unspecified affective disorder                                           |                                                                  | ICD10: F34, F39                                                      |
| Anxiety                                                                                |                                                                  | ICD8: 300-09,300-19 ICD10: F41-F42                                   |
| Alcohol and drug abuse                                                                 |                                                                  | ICD8: 303 ICD10: F10, F19                                            |
| Diabetes mellitus                                                                      | A10                                                              | ICD8: 250 ICD10:E10-E14                                              |

|                        |             |                           |
|------------------------|-------------|---------------------------|
| Cardiovascular disease |             | ICD8:410-414; ICD10:I , I |
| <b>Comedication</b>    |             |                           |
| Antipsychotics         | N05AA-N05AX |                           |
| Antidepressants        | N06A        |                           |

Supplementary Table S2: Mortality (%) in relation to ever use of BZD, age and follow-up time.

|                  | All     | Deaths |        | Never BZD | Deaths |        | Ever BZD | Deaths |        |
|------------------|---------|--------|--------|-----------|--------|--------|----------|--------|--------|
| Total            | 235,465 | 68,048 | (28.9) | 56,216    | 9,447  | (16.8) | 179,249  | 58,601 | (32.7) |
| <b>Age</b>       |         |        |        |           |        |        |          |        |        |
| 20-49 years      | 122,665 | 7,377  | (6.0)  | 39,109    | 801    | (2.0)  | 83,556   | 6,576  | (7.9)  |
| 50-69 years      | 56,745  | 17,831 | (31.4) | 8,282     | 1,886  | (22.4) | 48,463   | 15,945 | (32.9) |
| 70- years        | 56,055  | 42,840 | (76.4) | 8,825     | 6,760  | (76.6) | 47,230   | 36,080 | (76.4) |
| <b>Follow-up</b> |         |        |        |           |        |        |          |        |        |
| 0-2 years        | 235,465 | 26,211 | (11.3) | 56,216    | 4,617  | (8.2)  | 179,249  | 21,594 | (12.5) |
| 2-20.1 years     | 195,895 | 41,837 | (21.4) | 46,089    | 4,830  | (10.5) | 149,806  | 37,007 | (24.7) |

| Supplementary Table S3: Distribution of the most frequently (2 or more percent of all prescriptions) prescribed types of antidepressants in patients with affective disorder, 1995-2016. |                                                       |                          |
|------------------------------------------------------------------------------------------------------------------------------------------------------------------------------------------|-------------------------------------------------------|--------------------------|
| Benzodiazepine (ATC-code)                                                                                                                                                                | Total number of prescription (% of all prescriptions) | Number of ever users (%) |
| Zopiclone (N05CF01)                                                                                                                                                                      | 1942056 (19.2)                                        | 100,314 (42.6)           |
| Oxazepam (N05BA04)                                                                                                                                                                       | 1863330 (18.5)                                        | 93,267 (39.6)            |
| Diazepam (N05BA01)                                                                                                                                                                       | 1252766 (12.4)                                        | 60,677 (25.7)            |
| Zolpidem (N05CF02)                                                                                                                                                                       | 1185630 (11.7)                                        | 69,004 (29.3)            |
| Alprazolam (N05BA12)                                                                                                                                                                     | 885174 (8.8)                                          | 39,623 (16.8)            |
| Nitrazepam (N05CD02)                                                                                                                                                                     | 534027 (5.3)                                          | 24,866 (10.6)            |
| Pregabalin (N03AX16)                                                                                                                                                                     | 448 358 (4.4)                                         | 21,732 (9.2)             |
| Bromazepam (N05BA08)                                                                                                                                                                     | 433 857 (4.3)                                         | 12,072 (5.1)             |
| Clonazepam (N03AE01)                                                                                                                                                                     | 420 448 (4.2)                                         | 12,963 (5.5)             |
| Triazolam (N05CD05)                                                                                                                                                                      | 212 310 (2.1)                                         | 12,354 (5.2)             |
| Chlordiazepoxid (N05BA02)                                                                                                                                                                | 203 541 (2.0)                                         | 18,528 (7.9)             |
| Lorazepam (N05BA06)                                                                                                                                                                      | 202 060 (2.0)                                         | 8,787 (3.7)              |

Supplementary Table S4: Distribution of covariates in relation to ever use of benzodiazepines (BZD) and related drugs in patients with affective disorder, 1995-2016.

|                                                | Total Number | Number (%) BZD users |
|------------------------------------------------|--------------|----------------------|
| <b>Total</b>                                   | 235,465      | 179,249 (75.9)       |
| <b>Gender</b>                                  |              |                      |
| Male                                           | 91,463       | 67,160 (79.4)        |
| Female                                         | 144,002      | 112,089 (77.8)       |
| <b>Age at baseline (years)</b>                 |              |                      |
| 20-49                                          | 122,665      | 83,556 (68.1)        |
| 50-69                                          | 56,755       | 48,463 (85.4)        |
| 70-110                                         | 56,055       | 47,230 (84.3)        |
| <b>Marital status at baseline (%)</b>          |              |                      |
| Unmarried                                      | 75,449       | 48,674 (64.5)        |
| Married                                        | 92,504       | 73,619 (79.6)        |
| Divorced                                       | 33,687       | 28,192 (83.7)        |
| Widowed                                        | 32,048       | 27,710 (86.5)        |
| Unkown                                         | 1,777        | 723(40.6)            |
| <b>Educational level at baseline (%)</b>       |              |                      |
| Basic only                                     | 88,226       | 67,937 (77.0)        |
| Middle                                         | 88,724       | 66,080 (64.5)        |
| High                                           | 34,339       | 26,244 (76.4)        |
| Unknown                                        | 24,176       | 18,988 (78.5)        |
| <b>Depression subtype (%)</b>                  |              |                      |
| Manic/bipolar                                  | 13,548       | 10,460 (77.2)        |
| Single or recurrent depression, mild           | 31,898       | 23,657 (74.2)        |
| Single or recurrent depression, moderate       | 65,771       | 49,423 (75.1)        |
| Single or recurrent depression, severe         | 25,995       | 20,792 (80.0)        |
| Single or recurrent depression, other          | 87,828       | 67,208 (76.5)        |
| Persistent or unspecified affective disorder   | 10,425       | 7,709 (74.0)         |
| <b>Psychotropic medication at baseline (%)</b> |              |                      |
| Antipsychotic drugs                            | 54,051       | 49,694 (87.9)        |
| Antidepressant drugs                           | 175,307      | 140,672 (80.2)       |
| <b>Comorbidity at baseline (%)</b>             |              |                      |
| Anxiety                                        | 37,697       | 29,599 (78.5)        |
| Drug and alcohol abuse                         | 25,221       | 21,669 (86.0)        |
| Diabetes Mellitus                              | 13,750       | 10,798 (78.5)        |
| Cardiovascular disease                         | 23,134       | 20,615 (82.9)        |

Supplementary Table S5: The number (%) of patients with overlap in use of different drug types.

|                           | Cohort study   | Nested Case-control study |               |
|---------------------------|----------------|---------------------------|---------------|
|                           |                | Dementia cases            | Controls      |
| Never                     | 56,216 (23.8)  | 1,834 (18.8)              | 7,422 (19.0)  |
| BZD, only                 | 50,566 (21.5)  | 2,772 (28.4)              | 10,298 (26.3) |
| Z drugs only              | 28,915 (12.2)  | 873 (8.9)                 | 4,465 (11.4)  |
| Both                      | 99,768 (42.3)  | 4,297 (44.0)              | 16,919 (43.3) |
| Never                     | 56,216 (23.8)  | 1,834 (18.8)              | 7,460 (49.1)  |
| Long acting , only        | 13,487 (5.7)   | 798 (8.2)                 | 3,205 (8.2)   |
| Short/medium acting, only | 85,977 (36.5)  | 3,319 (34.0)              | 14,224 (36.4) |
| Both                      | 79,685 (33.8)  | 3,813 (39.0)              | 14,215 (36.4) |
| Never                     | 52,893 (22.5)  | 1,793 (18.4)              | 7,193 (18.4)  |
| Other anxiolytics, only   | 3,326 (1.4)    | 41 (0.4)                  | 229 (0.6)     |
| BZD, only                 | 151,144 (64.1) | 7,324 (74.5)              | 28,776 (7.4)  |
| Both                      | 28 105 (11.9)  | 659 (6.7)                 | 2,906 (7.4)   |

Supplementary Table S6: Hazard and Odds Ratios and 95% Confidence Intervals (CI) for associations of concurrent use of Benzodiazepines and related drugs with subsequent dementia in patients with affective disorders

|                           | Cohort study             |                           | Nested Case-control study |
|---------------------------|--------------------------|---------------------------|---------------------------|
|                           | Adjusted HR<br>0-2 years | Adjusted HR<br>2-20 years | Adjusted OR               |
| Never                     | 1                        | 1                         | 1                         |
| BZ, only                  | 1.02 (0.94-1.11)         | 0.97 (0.89-1.05)          | 0.99 (0.93-1.05)          |
| Z drugs only              | 0.93 (0.82-1.05)         | 0.92 (0.82-1.04)          | 0.87 (0.80-0.95)          |
| Both                      | 0.97 (0.90-1.03)         | 0.94 (0.87-1.03)          | 0.99(0.92-1.05)           |
| Never                     | 1                        | 1                         | 1                         |
| Long acting , only        | 1.00(0.90-1.11)          | 0.95 (0.86-1.06)          | 0.93 (0.85-1.00)          |
| Short/medium acting, only | 0.96 (0.86-1.04)         | 0.94 (0.86-1.02)          | 0.95 (0.89-1.01)          |
| Both                      | 1.00 (0.93-1.09)         | 0.98(0.89-1.06)           | 1.02 (0.96-1.09)          |
| Never                     | 1                        | 1                         | 1                         |
| Other anxiolytics, only   | 0.99 (0.92-1.07)         | 0.96 (0.89-1.03)          | 0.97 (0.92-1.03)          |
| BZD                       | 1.26 (0.75-2.09)         | 1.34 (0.80-2.23)          | 1.15 (0.81-1.629)         |
| Both                      | 0.92 (0.76-1.09)         | 0.94 (0.78-1.12)          | 0.87 (0.77-0.98)          |

Adjusted models include: gender age, marital status, education, depression subtype, year of diagnosis, psychotropic medication and comorbidity.



Supplementary Table S7: Hazard Ratios and 95% Confidence Intervals (CI) for associations of timing of use of Benzodiazepines and related drugs with subsequent dementia in patients with affective disorders

|                                             | Cohort study             |                             |
|---------------------------------------------|--------------------------|-----------------------------|
|                                             | Adjusted HR<br>0-2 years | Adjusted HR<br>2-20.1 years |
| Never use (n=56,216)                        | 1                        | 1                           |
| All types, continuing use (n=105,039)       | 0.30 (0.26-0.35)         | 0.70(0.62-0.80)             |
| All types, former user (n=43,581)           | 1.14 (1.05-1.22)         | 1.02(0.96-1.14)             |
| All types, new user (n=30,629)              | 0.31 (0.29-0.34)         | 0.76 (0.70-0.84)            |
| Never use (n=85,131)                        | 1                        | 1                           |
| BZD , continuing use (n=74,889)             | 0.34 (0.29-0.39)         | 0.78 (0.70-0.88)            |
| BZD, former use (n=46,321)                  | 0.99 (0.92-1.06)         | 1.05 (0.96-1.16)            |
| BZD , new use (n=29,124)                    | 0.33 (0.30-0.36)         | 0.83 (0.76-0.89)            |
| Never use (n=106,782)                       | 1                        | 1                           |
| Z-drug, continuing use (n=51,789)           | 0.25 (0.22-0.29)         | 0.90 (0.54-0.75)            |
| Z-drug, former use (n=38,738)               | 1.07 (1.00-1.14)         | 1.01 (0.92-1.11)            |
| Z-drug, new use (n=38,156)                  | 0.35 (0.33-0.39)         | 0.77 (0.72-0.83)            |
| Never use (n=142,314)                       | 1                        | 1                           |
| Long acting, continuing use(n=32,343)       | 0.20 (0.17-0.24)         | 0.78 (0.70-0.80)            |
| Long acting, former use( n=40,262)          | 0.98 (0.92-1.04)         | 1.05 (0.98-1.14)            |
| Z-drug, new use (n=20,546)                  | 0.33 (0.30-0.36)         | 0.86 (0.70-0.93)            |
| Never use (n=69,803)                        | 1                        | 1                           |
| Short acting, continuing use (n=85,776)     | 0.32 (0.29-0.36)         | 0.70 (0.63-0.78)            |
| Short acting, former use(n=43,274)          | 1.05 (0.97-1.13)         | 1.08 (0.97-1.19)            |
| Short acting, new use (n=36,612)            | 0.40 (0.34-0.43)         | 0.78 (0.72-0.84)            |
| Never use (n=204,037)                       | 1                        | 1                           |
| Other anxiolytics, continuing use (n=4,040) | 0.15 (0.12-0.21)         | 0.59 (0.53-0.67)            |
| Other anxiolytics, former use only(n=7,016) | 0.93 (0.80-1.09)         | 1.10 (0.91-1.32)            |
| Other anxiolytics, new use (n=20,372)       | 0.43 (0.30-0.62)         | 0.68 (0.47-0.99)            |

Never use= no pre or postdiagnostic use; continuing use= both pre- and postdiagnostic use; former use= prediagnostic use only, new use= postdiagnostic use , only.

All models include: gender age, marital status, education, depression subtype, year of diagnosis, psychotropic medication and comorbidity.

Supplementary Table S8. Odds Ratios and 95% Confidence Intervals (CI) for associations of Benzodiazepines (BZD) and Z drugs with dementia diagnosed before study entry

|                      | Excluded dementia cases diagnosed before study entry | Nested controls | Adjusted** Odd Ratio |
|----------------------|------------------------------------------------------|-----------------|----------------------|
| Never                | 4,389 (45.4)                                         | 4,815 (48.8)    | 1                    |
| Ever BZD or Z drugs* | 5,282 (54.6)                                         | 4,856 (50.2)    | 0.93 (0.78-1.00)     |

\*from 1995 until 2 years before diagnosis (before study entry)

\*\* adjusted for gender age, marital status, education, depression subtype, year of diagnosis, psychotropic medication and comorbidity.

Supplementary Table S9: Subdistribution Hazard Ratios and 95% Confidence Intervals (CI) for associations of Benzodiazepines and related drugs at baseline with subsequent dementia in patients with affective accounting for competing mortality

|                     | 0-2 years follow-up | 2+ years         |
|---------------------|---------------------|------------------|
| <i>Ever use</i>     | 0.72 (0.68-0.77)    | 1.00 (0.93-1.08) |
| BZD                 | 0.75 (0.72-0.79)    | 1.02 (0.96-1.09) |
| Z-drugs             | 0.77 (0.73-0.82)    | 0.96 (0.90-1.01) |
| Long acting         | 0.82 (0.77-0.87)    | 1.01 (0.95-1.06) |
| Short medium acting | 0.75 (0.71-0.79)    | 1.00(0.94-1.07)  |
| Other anxiolytics   | 0.77 (0.67-0.89)    | 0.90(0.76-1.06)  |

Models adjusted for gender and age.

Supplementary Figure S1: Adjusted Hazard and Odds Ratios (95% Confidence Intervals) of the association between number of prescriptions and cumulated dose (DDD) of treatment with BZD and Z-drugs as cubic splines with 4 knots and subsequent dementia in patients with affective disorders. A value of 1 prescription/DDD was reference value.

### Cohort design (2-201 years follow-up)

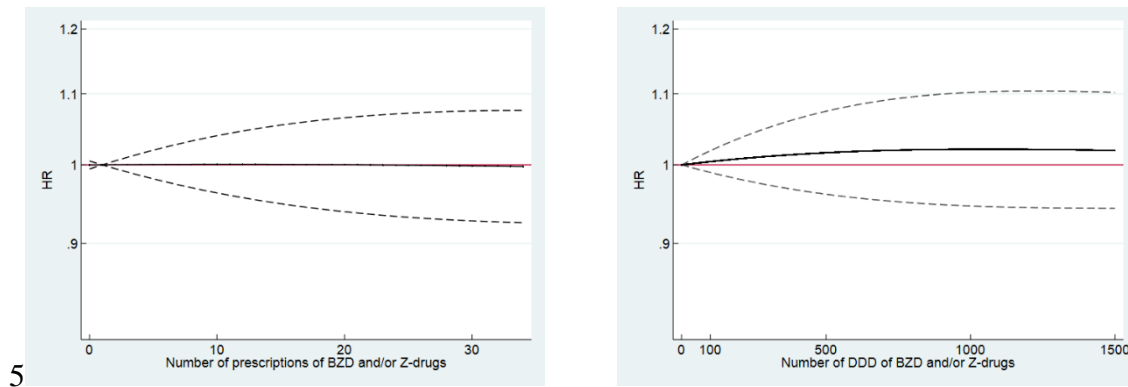

### Nested Case-control design

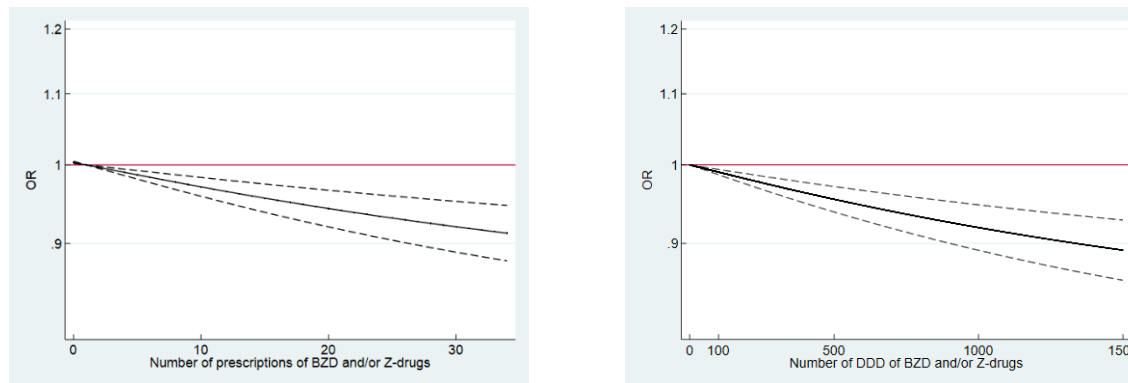

Supplement: appi.ajp.2019.19030315.ds001.pdf [file appi.ajp.2019.19030315.ds001.pdf]
